# Supplementary material for: Mitotic chromosome length scales in response to both cell and nuclear size
Source: PubMed Central journal article supplement — J Cell Biol. 2015 Jun 8;209(5):645–52. doi: 10.1083/jcb.201502092 (PMC4460153; doi:10.1083/jcb.201502092), 2015-06-08
Supplement: supp_jcb.201502092_JCB_201502092_sm.pdf [file supp_jcb.201502092_JCB_201502092_sm.pdf]

Ladouceur et al., <http://www.jcb.org/cgi/content/full/jcb.201502092/DC1>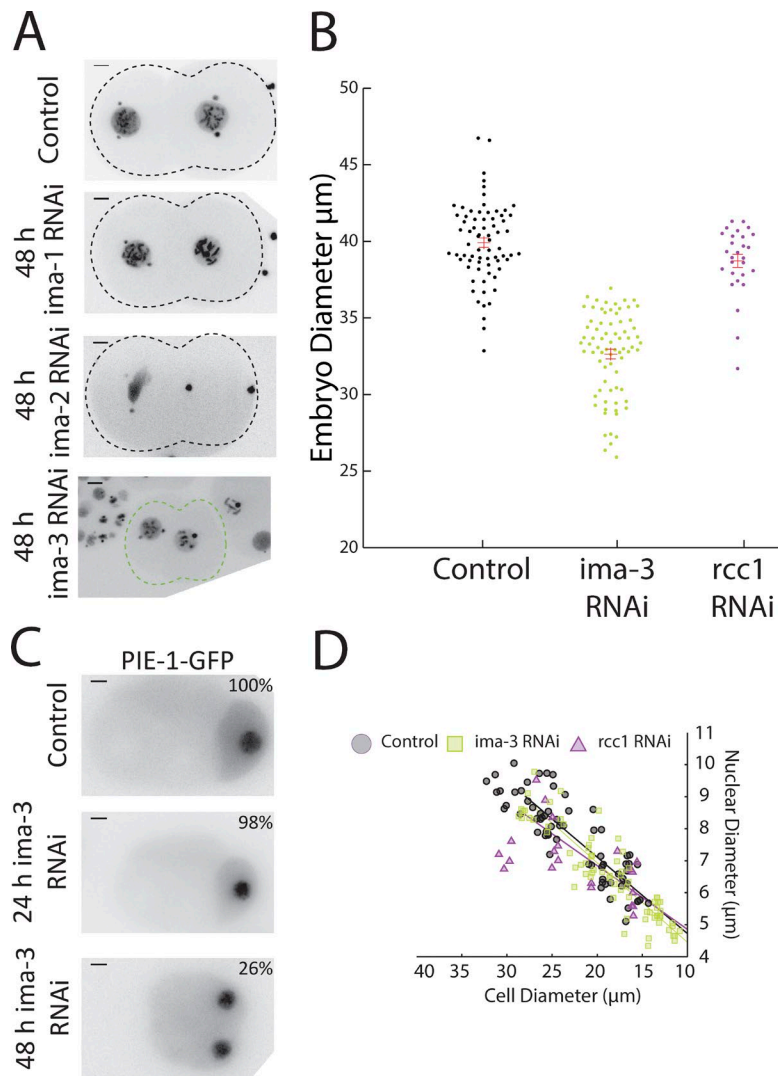

Figure S1. **Embryo size differences for IMA-1 to -3 RNAi and RCC1 RNAi, PIE-1::GFP localization at the 4-cell stage, and nuclear to cell diameter relation in control, IMA-3, and RCC1 RNAi embryos.** (A) Embryos depleted of the three importin- $\alpha$  proteins found in *C. elegans*. The outlines of the embryos are depicted with dashed black lines. (B) Embryo diameter in control, ima-3, or rcc1 RNAi. Error bars are standard error of the mean. (C) Percentage of embryos with the indicated localization or mislocalization of Pie-1::GFP in the P2 cell after 48- or 24-h depletion of ima-3. (A and C) Bars, 5  $\mu\text{m}$ . (D) Correlation of cell to nucleus diameter in control or rcc1 RNAi embryos. Linear regression values are presented in Table S3.

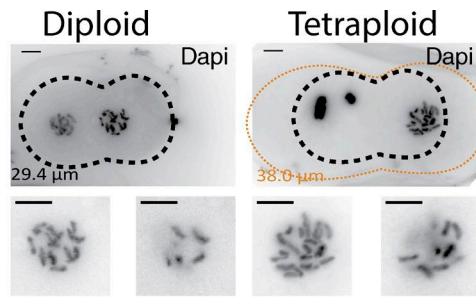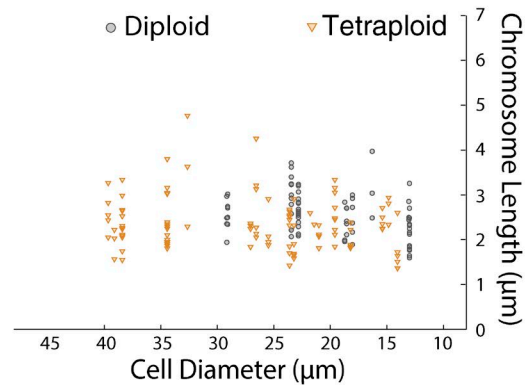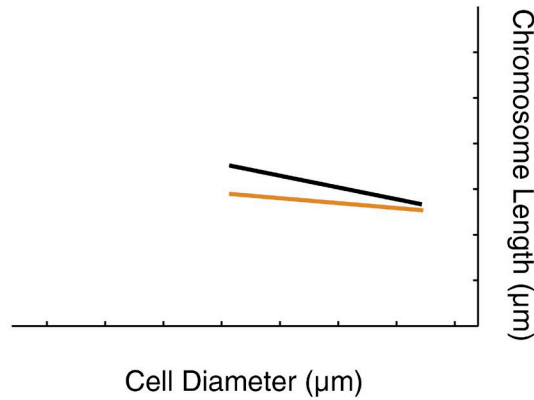

|            | Slope           | pValue    | Intercept       | pValue   |
|------------|-----------------|-----------|-----------------|----------|
| Diploid    | 0.048 +/- 0.014 | 0.0010702 | 1.690 +/- 0.275 | 5.88E-08 |
| Tetraploid | 0.020 +/- 0.016 | 0.2044    | 1.892 +/- 0.342 | 6.34E-07 |

Figure S2. **Chromosome length analysis in diploid versus tetraploid worms.** Representative still images of diploid and tetraploid embryos at the 2-cell stage. Shown is the outline of the embryo and size of the depicted embryo: black, diploid; orange, tetraploid. The diploid outline is overlaid on the tetraploid to illustrate differences in size. Bars, 5  $\mu$ m. Chromosome length correlated to cell size in diploid and tetraploid embryos from the 1- to 16-cell stage. Graph and table representing the linear regression of cell size versus chromosome length are shown. Diploid,  $n = 97$ ; tetraploid,  $n = 156$ .

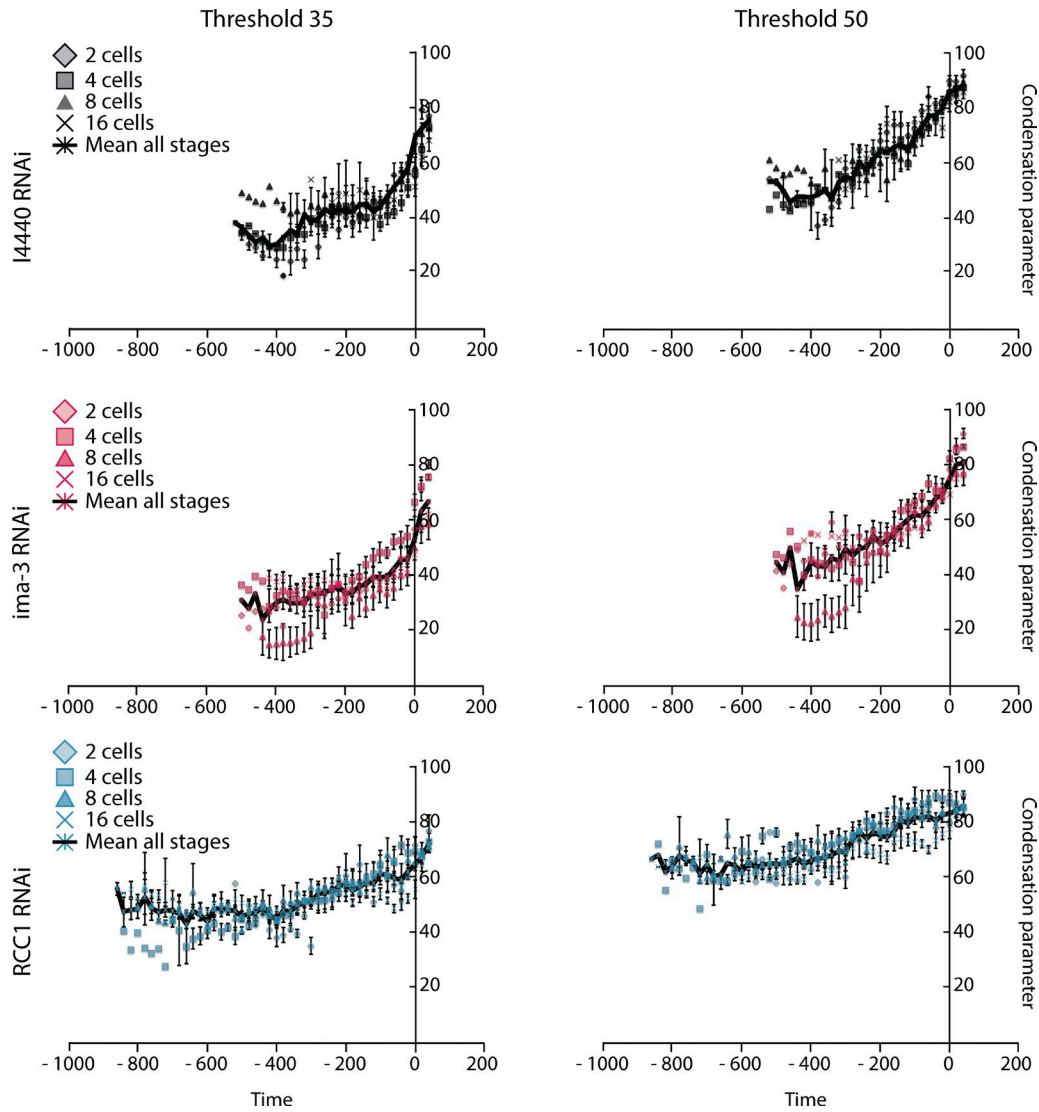

Figure S3. **Plot of condensation dynamics at all developmental stages examined in this study.** The number of pixels with a value below a threshold of either 35 or 50% is shown as indicated. Error bars are standard error of the mean.

Table S1. **One-way ANOVA comparing developmental stage for each RNAi condition or all RNAi conditions at each developmental stage**

| Condition/developmental stage | ANOVA significance |
|-------------------------------|--------------------|
| <b>Condition</b>              |                    |
| Control RNAi                  | P < 0.0001         |
| ima-3 RNAi                    | P < 0.0001         |
| rcc1 RNAi                     | P < 0.0001         |
| <b>Developmental stage</b>    |                    |
| 1-cell stage                  | P < 0.0001         |
| 2-cell stage                  | P < 0.0001         |
| 4-cell stage                  | P < 0.0001         |
| 8-cell stage                  | P < 0.0001         |
| 16-cell stage                 | P < 0.0001         |

One-way ANOVA comparing chromosome length differences measured in control, ima-3, and rcc1 RNAi at all developmental stages. The top half of the table shows the ANOVA significance for comparisons of chromosome length differences between all developmental stages from 1- to 16-cell stage for each RNAi condition. The bottom half of the table shows the ANOVA significance for comparisons of chromosome length differences between all RNAi conditions for each developmental stage from 1- to 16-cell stage. Using the Bonferroni correction gives a significance threshold of 0.01. Control RNAi,  $n = 354$  chromosomes; IMA-3 RNAi,  $n = 287$  chromosomes; RCC1 RNAi,  $n = 207$  chromosomes.

Table S2. Student's *t* test statistical significance of chromosome length differences comparing all developmental stages for each RNAi condition

| Developmental stage | Control RNAi | ima-3 RNAi | rcc1 RNAi |
|---------------------|--------------|------------|-----------|
| 1 cell vs. 2 cell   | ns           | ns         | P ≤ 0.05  |
| 1 cell vs. 4 cell   | ns           | P ≤ 0.05   | P ≤ 0.05  |
| 1 cell vs. 8 cell   | P ≤ 0.05     | P ≤ 0.05   | P ≤ 0.05  |
| 1 cell vs. 16 cell  | P ≤ 0.05     | P ≤ 0.05   | P ≤ 0.05  |
| 2 cell vs. 4 cell   | ns           | ns         | ns        |
| 2 cell vs. 16 cell  | P ≤ 0.05     | P ≤ 0.05   | P ≤ 0.05  |
| 2 cell vs. 16 cell  | P ≤ 0.05     | P ≤ 0.05   | ns        |
| 4 cell vs. 8 cell   | P ≤ 0.05     | ns         | ns        |
| 4 cell vs. 16 cell  | P ≤ 0.05     | P ≤ 0.05   | ns        |
| 8 cell vs. 16 cell  | ns           | P ≤ 0.05   | ns        |

The multiple comparisons Student's *t* test was corrected using the Bonferroni correction. ns, not significant.

Table S3. Correlation between cell size, nuclei size, and chromosome length in control and IMA-3-, RCC1-, and NTF-2-depleted embryos

| Parameter                                              | Slope                 | P-value                  | Intercept            |
|--------------------------------------------------------|-----------------------|--------------------------|----------------------|
| <b>Cell diameter vs. chromosome length (μm)</b>        |                       |                          |                      |
| Control (333)                                          | 0.052 ± 0.01          | 4.11 × 10 <sup>-7</sup>  | 2.056 ± 0.251        |
| ima-3 RNAi (285)                                       | 0.053 ± 0.007         | 1.38 × 10 <sup>-11</sup> | 1.79 ± 0.144         |
| rcc1 RNAi (185)                                        | <b>0.019 ± 0.012</b>  | 0.1016                   | <b>1.857 ± 0.245</b> |
| <b>Nuclear diameter vs. chromosome length (μm)</b>     |                       |                          |                      |
| Control (316)                                          | 0.130 ± 0.033         | 0.00011151               | 2.182 ± 0.252        |
| ima-3 RNAi (272)                                       | <b>0.210 ± 0.026</b>  | 4.28 × 10 <sup>-14</sup> | <b>1.387 ± 0.179</b> |
| rcc1 RNAi (165)                                        | <b>0.120 ± 0.036</b>  | 0.0010262                | <b>1.436 ± 0.264</b> |
| <b>Cell diameter vs. nuclear diameter (μm)</b>         |                       |                          |                      |
| Control (64)                                           | 0.239 ± 0.022         | 2.62 × 10 <sup>-15</sup> | 2.334 ± 0.477        |
| ima-3 RNAi (70)                                        | 0.249 ± 0.016         | 7.13 × 10 <sup>-24</sup> | 1.965 ± 0.291        |
| rcc1 RNAi (21)                                         | 0.199 ± 0.046         | 0.00056384               | 2.861 ± 0.954        |
| <b>Cell volume vs. nuclear volume (μm<sup>3</sup>)</b> |                       |                          |                      |
| Control (37)                                           | 0.009688 ± 0.0009577  | 6.25 × 10 <sup>-12</sup> | 183.55 ± 13.85       |
| rcc1 RNAi (23)                                         | 0.0053036 ± 0.0020787 | <b>0.0186</b>            | 105.63 ± 27.965      |
| nif2 RNAi (27)                                         | 0.002163 ± 0.001139   | <b>0.0693</b>            | 120.4 ± 13.22        |

Bold indicates statistically different from control. P-value is the possibility of the slope being different than 0.

Table S4. Time spent in prophase in control and RCC1-depleted embryos

| RNAi  | Mean time  |
|-------|------------|
| l4440 | 4 min 30 s |
| Rcc1  | 4 min 35 s |

Time represents time of centrosome growth from duplication to NEBD.

Table S5. Statistical differences of chromosome length variance at all different stages between control and RCC1-depleted embryos

| Developmental stage | Variance control | Variance rcc1 RNAi embryos | Statistically different |
|---------------------|------------------|----------------------------|-------------------------|
|                     | <i>μm</i>        | <i>μm</i>                  |                         |
| 1-cell stage        | 1.914            | 1.925                      | No                      |
| 2-cell stage        | 1.751            | 2.113                      | No                      |
| 4-cell stage        | 1.405            | 1.966                      | Yes                     |
| 8-cell stage        | 1.858            | 1.226                      | No                      |
| 16-cell stage       | 1.626            | 1.245                      | No                      |
